# Supplementary material for: Liquid bridge: liquid metal bridging spherical BN largely enhances the thermal conductivity and mechanical properties of thermal interface materials
Source: Royal Society of Chemistry journal article supplement (doi:10.1039/d2tc00099g), 2022-01-01
Supplement: d2tc00099g1.pdf [file d2tc00099g1.pdf]

## Supplementary Information

### Liquid Bridge-Liquid metal largely enhances thermal conductivity and mechanical properties of thermal interface material

Junhong Li<sup>a,b</sup>, Qiangqiang Ma<sup>b</sup>, Shan Gao<sup>b</sup>, Ting Liang<sup>b</sup>, Yunsong Pang<sup>b</sup>, Xiangliang Zeng<sup>b</sup>, Ya-yun Li<sup>a,\*</sup>, Xiaoliang Zeng<sup>b</sup>, Rong Sun<sup>b</sup> and Linlin Ren<sup>b,\*</sup>

<sup>a</sup> College of Materials Science and Engineering, Shenzhen University, Shenzhen 518060, China.

<sup>b</sup> Shenzhen Institute of Advanced Electronic Materials, Shenzhen Institute of Advanced Technology, Chinese Academy of Sciences, Shenzhen, 518055, China.

#### Corresponding Author

Ya-yun Li <sup>a\*</sup>: [kittyli@szu.edu.cn](mailto:kittyli@szu.edu.cn);

Linlin Ren <sup>a\*</sup>: [ll.ren@siat.ac.cn](mailto:ll.ren@siat.ac.cn)

#### Other Supplementary Materials for this paper include:

Graphical Abstract (supplied as independent files)

Supplementary Movie 1 (supplied as independent files)

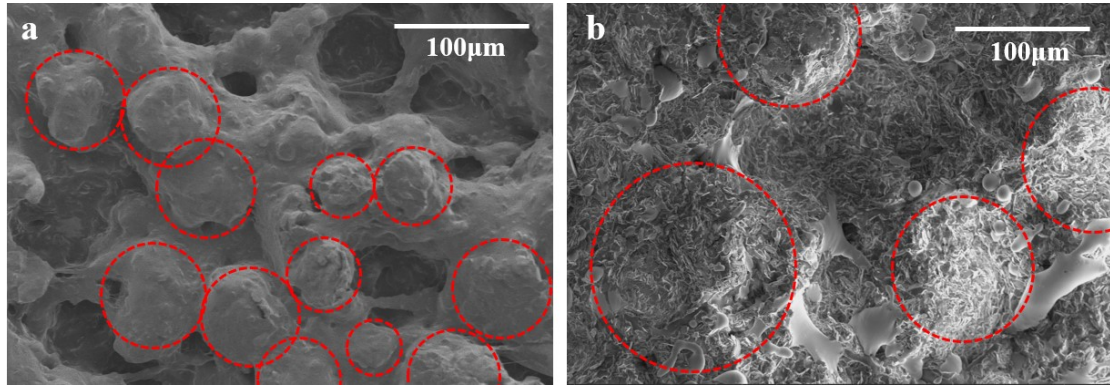

Fig. S1 (a) SEM images of SBN/PDMS TIMs and (b) SEM images of LM/SBN/PDMS TIMs.

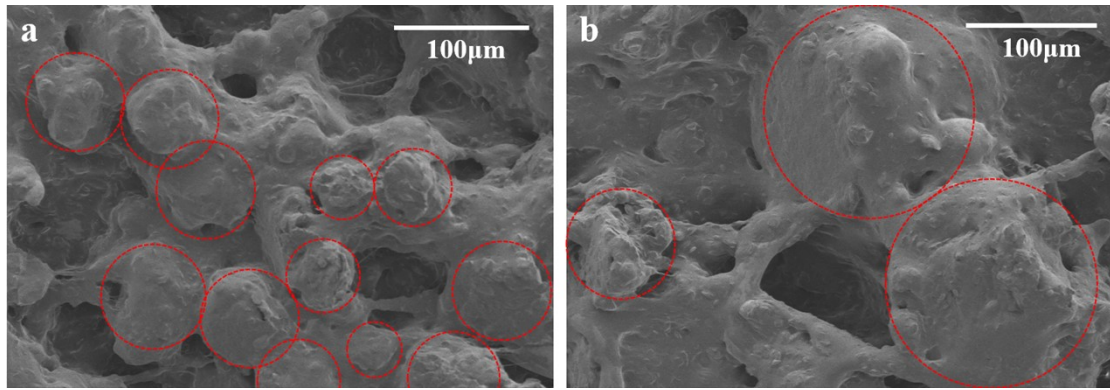

Fig. S2 a) SEM image of SBN-60/PDMS and b) SEM image of SBN-160/PDMS.

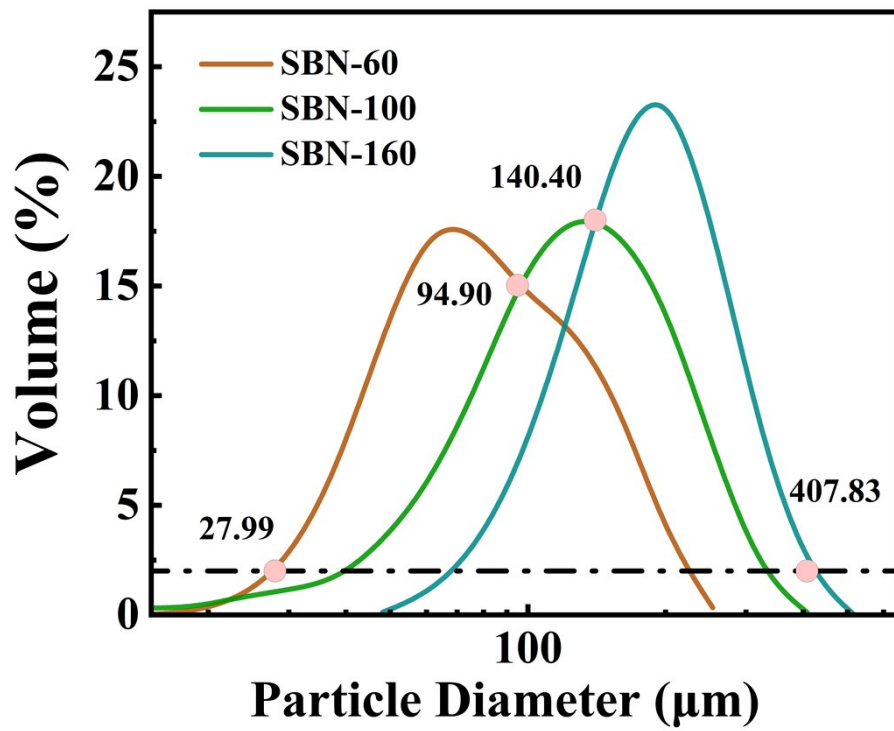

Fig. S3. Particle Diameter of SBN-60, SBN-100 and SBN-160

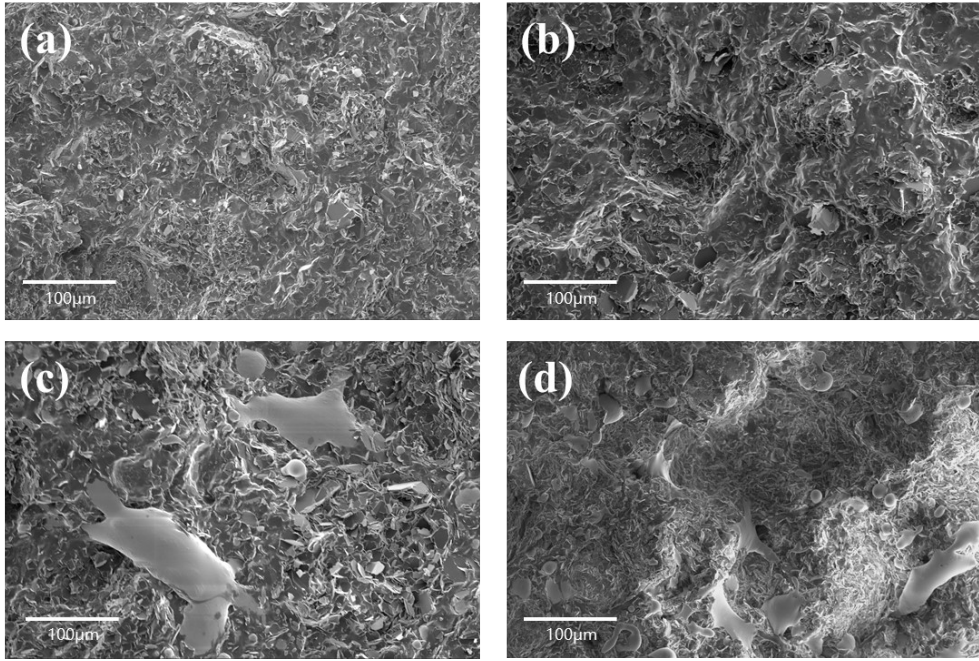

Fig. S4. SEM images of (a) SBN/PDMS TIMs. (b) LM/SBN/PDMS TIMs.  
(c) LM/SBN/PDMS TIMs. (d) LM/SBN/PDMS TIMs.

Table S1. The Total Energy Change of the System Before and After the Formation of  
The Liquid Metal Bridge

| $\gamma_F^d$ | $\gamma_F^p$ | $\gamma_P^d$ | $\gamma_P^p$ | $\gamma_M^d$ | $\gamma_M^p$ | $W_{FM}$ | $W_{PF}$ | $W_{PM}$ | $\Delta W$ |
|--------------|--------------|--------------|--------------|--------------|--------------|----------|----------|----------|------------|
| 45.88        | 5.42         | 23.45        | 4.63         | 0.42         | 0.06         | 9.92     | 75.62    | 7.34     | -73.04     |

Table S2. Different Filler Compound Systems

| Number | Volume Fraction/% |         |         |
|--------|-------------------|---------|---------|
|        | SBN-60            | SBN-100 | SBN-160 |
| 1      | 33.82             | 14.64   | 51.54   |
| 2      | 39.10             | 60.90   | —       |
| 3      | 33.82             | —       | 66.18   |
| 4      | —                 | 28.41   | 71.59   |

Table S3. Energy Loss

| Cycle | Sample   |                 |
|-------|----------|-----------------|
|       | SBN/PDMS | 2:1 LM/SBN/PDMS |
| 1     | 49.44    | 59.30           |
| 2     | 24.45    | 28.43           |
| 3     | 22.37    | 23.95           |
| 4     | 23.55    | 24.50           |
| 5     | 22.34    | 23.86           |
| 6     | 21.33    | 23.64           |
| 7     | 20.97    | 24.63           |
| 8     | 22.71    | 23.56           |
| 9     | 23.38    | 22.72           |
| 10    | 20.51    | 20.12           |
